# Supplementary material for: Thermally stable, planar hybrid perovskite solar cells with high efficiency
Source: Royal Society of Chemistry journal article supplement (doi:10.1039/c8ee02242a), 2018-01-01
Supplement: c8ee02242a1.pdf [file c8ee02242a1.pdf]

## Electronic Supplementary Information

### **Thermally Stable, Planar Hybrid Perovskite Solar Cells with High Efficiency**

Kyoungwon Choi,‡ Junwoo Lee,‡ Hong Il Kim, Cheol Woong Park, Guan-Woo Kim, Hyuntae Choi, Sungjin Park, Sang Ah Park and Taiho Park\*

[\*] Prof. Taiho Park. Corresponding-Author: E-mail: [taihopark@postech.ac.kr](mailto:taihopark@postech.ac.kr)

[‡] These authors are contributed equally to this manuscript.

*Department of Chemical Engineering, Pohang University of Science and Technology (POSTECH), 77 Cheongam-Ro, Nam-gu, Pohang, Gyeongbuk, Republic of Korea. Fax: +82-54-279-8298; Tel: +82-54-279-2394*

## Contents

### Experimental details

**Fig. S1** Chemical structures of the 3-(1-Pyridinio)-1-propanesulfonate used in this study and ESP map of the zwitterion.

**Fig. S2** XPS survey spectrum of SnO<sub>2</sub>.

**Fig. S3** XPS high resolution spectra of SnO<sub>2</sub> and Zw-SnO<sub>2</sub> for Sn 3d, respectively.

**Fig. S4** Absorption spectra of SnO<sub>2</sub> and Zw-SnO<sub>2</sub>, respectively. Insets: Corresponding Tauc plots for bandgap extraction.

**Fig. S5** (a) NEXAFS PEY mode of Zw-SnO<sub>2</sub>. (b) Intensities of  $\pi^*$  transitions vs incidence angle.

**Fig. S6** (a) *I*-*V* characteristics of FTO/SnO<sub>2</sub>/Au, FTO/SnO<sub>2</sub>/PEIE/Au, FTO/SnO<sub>2</sub>/IL/Au and FTO/SnO<sub>2</sub>/zwitterion/Au devices, respectively. (b) SEM images of each ETLs with different interlayers, respectively.

**Fig. S7** (a) Contact angle images of each ETL using glycerol and DI water, respectively. (b) Contact angle values and surface energies of each ETL.

**Fig. S8** Top-view SEM images of perovskite films on the SnO<sub>2</sub> and Zw-SnO<sub>2</sub>, respectively.

**Fig. S9** Normalized absorbance at 700nm for perovskite films on the SnO<sub>2</sub> and Zw-SnO<sub>2</sub>, respectively.

**Fig. S10** Cross-sectional SEM images of the SnO<sub>2</sub> and Zw-SnO<sub>2</sub>-based samples under heat treatment at 150°C.

**Fig. S11** PCE of the SnO<sub>2</sub> and Zw-SnO<sub>2</sub>-based device as a function of time under 1 sun illumination.

**Fig. S12** IPCE measurement and integrated  $J_{SC}$  of (a) SnO<sub>2</sub>, Zw-SnO<sub>2</sub> and (b) CBD-Zw-SnO<sub>2</sub> device, respectively.

**Fig. S13**  $J_{SC}$  dependence on light intensity.

**Fig. S14** Optical microscope images of Zw-SnO<sub>2</sub> with different concentrations, respectively.

**Fig. S15** Steady state photoluminescence (PL) spectra of the SnO<sub>2</sub> and the Zw-SnO<sub>2</sub>, respectively.

**Fig. S16** Equivalent circuit model for EIS measurement.

**Fig. S17** Temperature-dependent thermal stability of SnO<sub>2</sub> and Zw-SnO<sub>2</sub>-based devices, respectively.

**Fig. S18** Time-dependent thermal stability of device based on different concentrations of zwitterion at 85°C, 85 % humidity.

**Fig. S19** *J*-*V* curves of asy\_PBTBDT\_Zw-SnO<sub>2</sub>-based device.

**Fig. S20** TGA curve of 3-(1-pyridinio)-1-propanesulfonate.

**Fig. S21** Long-term stability test at 25°C, 25% humidity.

**Table S1** Calculated parameters for the energy level of ETLs

**Table S2** Calculated conductivities of each ETL with the different interlayers

**Table S3** Photovoltaic parameters obtained from the best devices at each condition

**Table S4** Summary of the electron lifetimes

**Table S5** Slope of the Mott-Schottky plots and doping densities of ETLs

**Table S6** Parameters of the equivalent circuit

**Table S7** The initial absolute PCEs for SnO<sub>2</sub> and Zw-SnO<sub>2</sub> devices

**Table S8** Summary of device performances obtained from devices employing Spiro\_SnO<sub>2</sub>, Spiro\_Zw-SnO<sub>2</sub>, Polymer\_SnO<sub>2</sub> and Polymer\_Zw-SnO<sub>2</sub>

## Experimental details

### 1) Device characterization

The  $J$ - $V$  curve and maximum power point efficiency (MPP) was measured by using Keithley 2400 SMU and an Oriel xenon lamp (450 W) with an AM1.5 filter. The solar cell performance was characterized under AM 1.5G illumination of  $100 \text{ mWcm}^{-2}$  (Oriel 1 kW solar simulator), which was calibrated with a KG5 filter certified by NREL. The  $J$ - $V$  curves of all devices were measured by reverse (1.2 V to -0.2 V) or forward (-0.2 V to 1.2 V) with  $0.02 \text{ Vs}^{-1}$  of scan rate. The active area of device is  $0.09 \text{ cm}^2$ . The MPP was measured under the maximum power point voltage. The conductivity of ETLs was calculated by following equation:

$$\sigma = Id / VA$$

where,  $A$  is the area ( $0.09 \text{ cm}^2$ ) and  $d$  is the thickness of the samples.

### 2) IPCE measurement

Constant 100 W Xenon lamp source with an automated monochromator filters and  $0.76 \text{ mm} \times 1.0 \text{ mm}$  rectangular spot size was used for incident photon-to-current efficiency (IPCE) spectra. The measurements were conducted in the wavelength range from 300 to 1100 nm, chopped at 4 Hz (IQE-200B model).

### 3) PL measurement

Time-resolved photoluminescence (TRPL) measurements were performed using time correlated single photon counting (TCSPC) system (HAMAMATSU/C11367-31). For TRPL measurements, a pulsed laser source was laser diode with a wavelength of 474 nm, a repetition rate of 100 kHz, fluence of  $\sim 4 \text{ nJ/cm}^2$  and a pulse width of 70 ps. Steady state photoluminescence (PL) measurements were performed using the high resolution monochromator and hybrid photomultiplier detector (PMA Hybrid 40, PicoQuant GmbH). The TRPL and steady-state PL measurements were conducted using prepared samples: glass/perovskite or glass/ETL/perovskite or FTO/ETL/perovskite. The samples were excited from the glass side under ambient conditions with excitation wavelength of 474nm. The PL decay constants were calculated using a bi-exponential equation:

$$f(t) = A_1 \exp\left(-\frac{t}{\tau_1}\right) + A_2 \exp\left(-\frac{t}{\tau_2}\right) + y_0$$

where,  $A$  is the decay amplitude, and  $\tau$  is the decay time.

### 4) SEM measurement

Field emission scanning electron microscope (FE-SEM, Hitachi S 4800) was employed for the surface of the electron transport layers (ETLs).

### 5) UV-vis measurement

The Ultraviolet-visible (UV-vis) absorption spectra were obtained using a Mecasys Optizen Pop UV-vis spectrophotometer for FTO/SnO<sub>2</sub> and FTO/Zw-SnO<sub>2</sub>.

## 6) UPS measurement

The UPS measurements were carried out using AXIS-NOVA and Ultra DLD (KRATOS Inc.) Mono-chromatic He I (21.22 eV) for UPS base pressure  $2.0 \times 10^{-9}$  Torr without surface treatment. UPS measurement

## 7) FT-IR measurement

The Fourier transform infrared spectra of SnO<sub>2</sub> and Zw-SnO<sub>2</sub> were measured using a Cary 600 spectrometer equipped with a MCT-A (mercury cadmium telluride) detector.

## 8) SCLC measurement

The device structure of FTO/ETL/perovskite/LiF/Al was measured using a Keithely 2400 SMU (0 V to 5V) to evaluate the trap densities of devices. The trap densities were calculated using the following equation:

$$V_{TFL} = \frac{en_t d^2}{2\epsilon\epsilon_0}$$

where  $V_{TFL}$  is the trap-filled limit voltage,  $e$  is the elementary charge,  $n_t$  is the trap density,  $d$  is the film thickness,  $\epsilon$  is the dielectric constant, and  $\epsilon_0$  is the vacuum permittivity.

## 9) Contact angle measurement

Contact angle images were measured under white LED module. Di-water and glycerol were applied to calculate surface energy (the polar surface tension 50.7 mJm<sup>-2</sup> for di-water, 1.8 mJm<sup>-2</sup> for glycerol and the dispersion surface tension 22.1 mJm<sup>-2</sup> for di-water, 49 mJm<sup>-2</sup> for glycerol were used). The samples (FTO bare glass, SnO<sub>2</sub>, Zw-SnO<sub>2</sub> substrates) were prepared with same process mentioned at solar cell fabrication.

## 10) Near-Edge X-Ray Absorption of Fine Structure (NEXAFS) and XPS measurement

NEXAFS and XPS measurements were performed at 4D PES beamline of PAL in Korea. We used the partial electron yield (PEY) detection mode for the NEXAFS spectra by recording the sample current normalized to a signal current.

## 11) Optical microscope measurement

The optical microscope images were measured using an Axioplan microscope (ZEISS).

## 12) Impedance measurement

The impedance of perovskite solar cells were measured using a computer-controlled potentiostat (SP-200, BioLogic). For FTO/ETL/perovskite/Spiro-OMeTAD/Au devices, electrochemical impedance spectroscopy (EIS) plot was measured in the frequency range of 1 MHz to 1 Hz in the dark condition under a bias of  $V_{OC}$ . The doping density was calculated using the Mott–Schottky equation, as follows:

$$\frac{1}{C^2} = \frac{2}{\epsilon\epsilon_0 e A^2 N} (V_{bi} - V)$$

where C is the capacitance,  $\epsilon$  is dielectric constant,  $\epsilon_0$  is the permittivity of free space, e is the elementary charge, A is the active area (0.09 cm<sup>2</sup>), N is the doping density of the semiconductor, and V is the applied bias.

### **13) XRD measurement**

X-Ray diffraction analysis (XRD, Rigaku D/Max-2200/PC) was employed for perovskite crystal phase identification.

### **14) DFT calculation**

Density Functional Theory (DFT) calculations were carried out to calculate the density of states of the perovskite crystal using the PWSCF program of the Quantum Espresso software package with a planewave/pseudopotential approach.<sup>1</sup>

### **15) TGA measurement**

The TGA data were obtained under nitrogen atmosphere on a TGA Q50 analyzer.

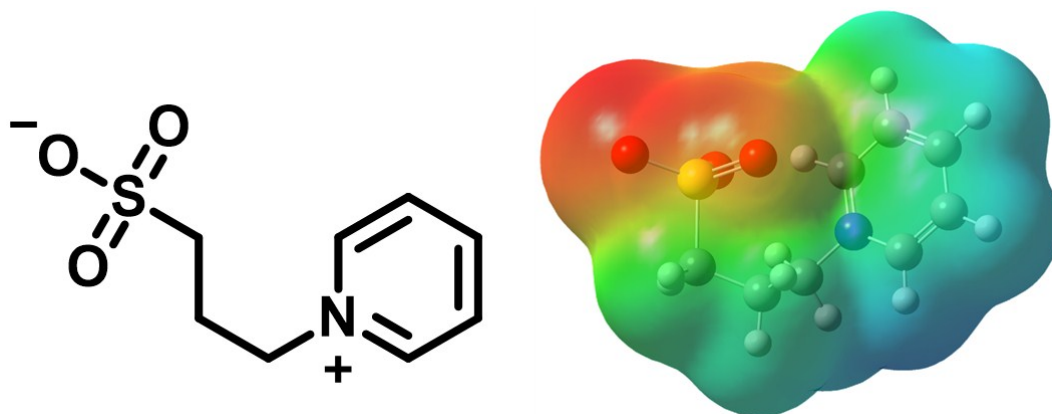

**Fig. S1** Chemical structures of the 3-(1-Pyridinio)-1-propanesulfonate used in this study and ESP map of the zwitterion.

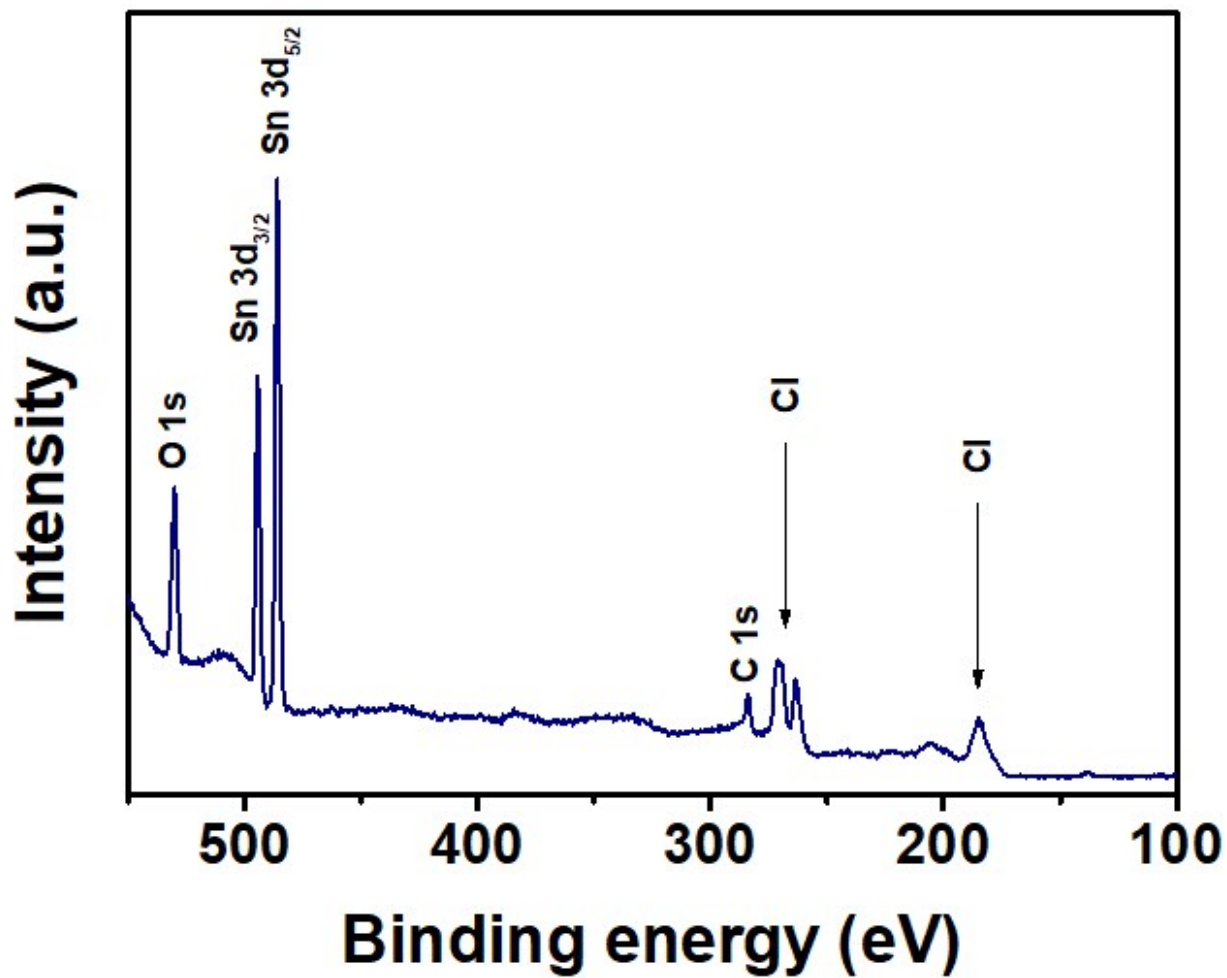

Fig. S2 XPS survey spectrum of SnO<sub>2</sub>.

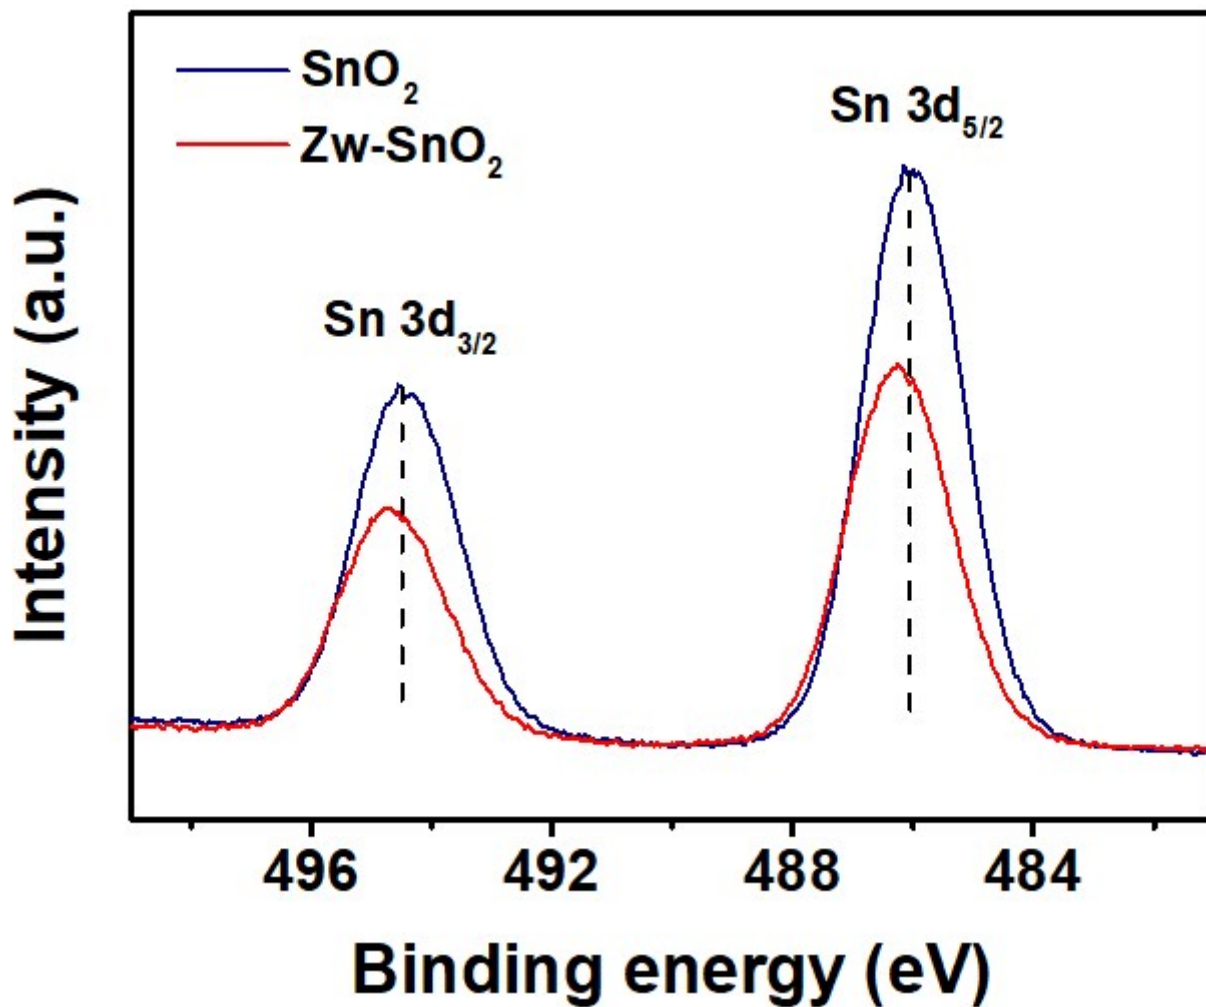

Fig. S3 XPS high resolution spectra of SnO<sub>2</sub> and Zw-SnO<sub>2</sub> for Sn 3d, respectively.



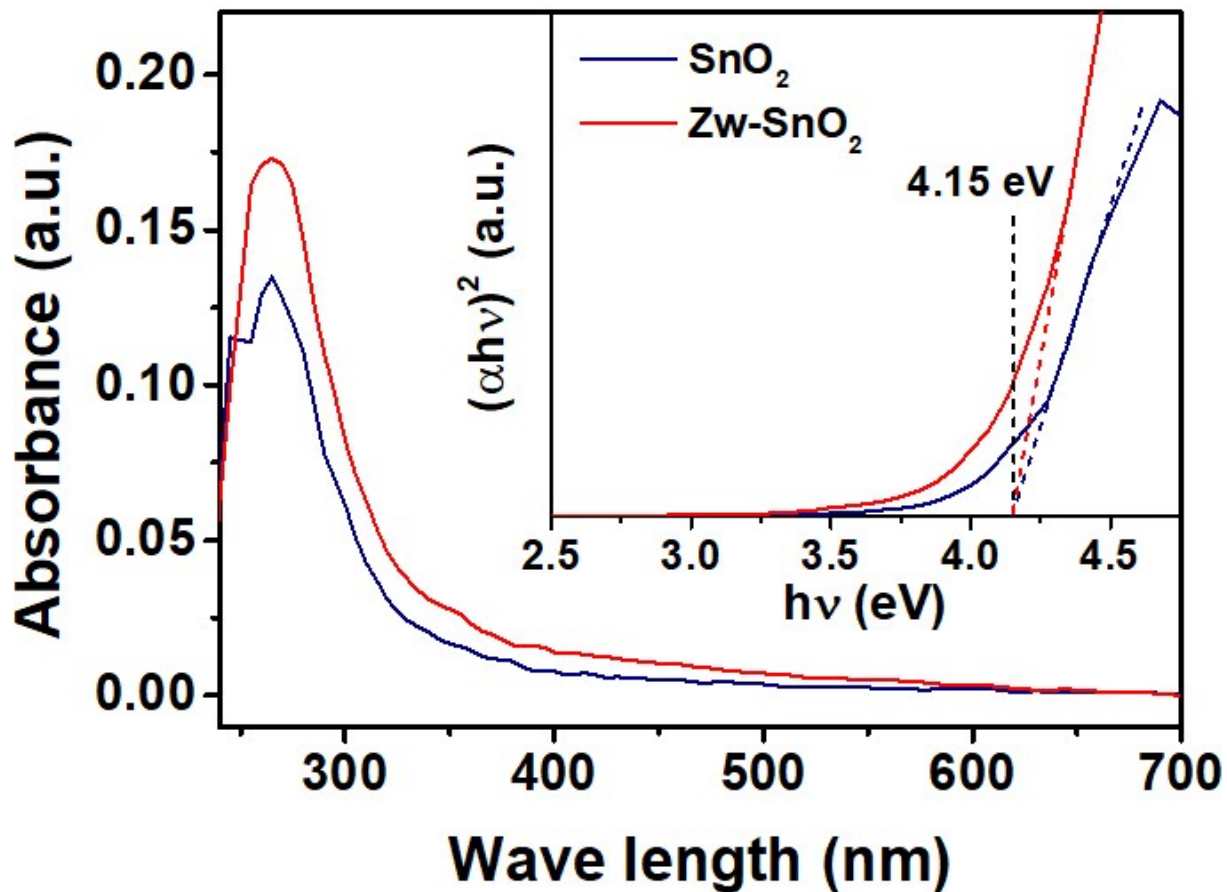

**Fig. S4** Absorption spectra of SnO<sub>2</sub> and Zw-SnO<sub>2</sub>, respectively. Insets: Corresponding Tauc plots for bandgap extraction.

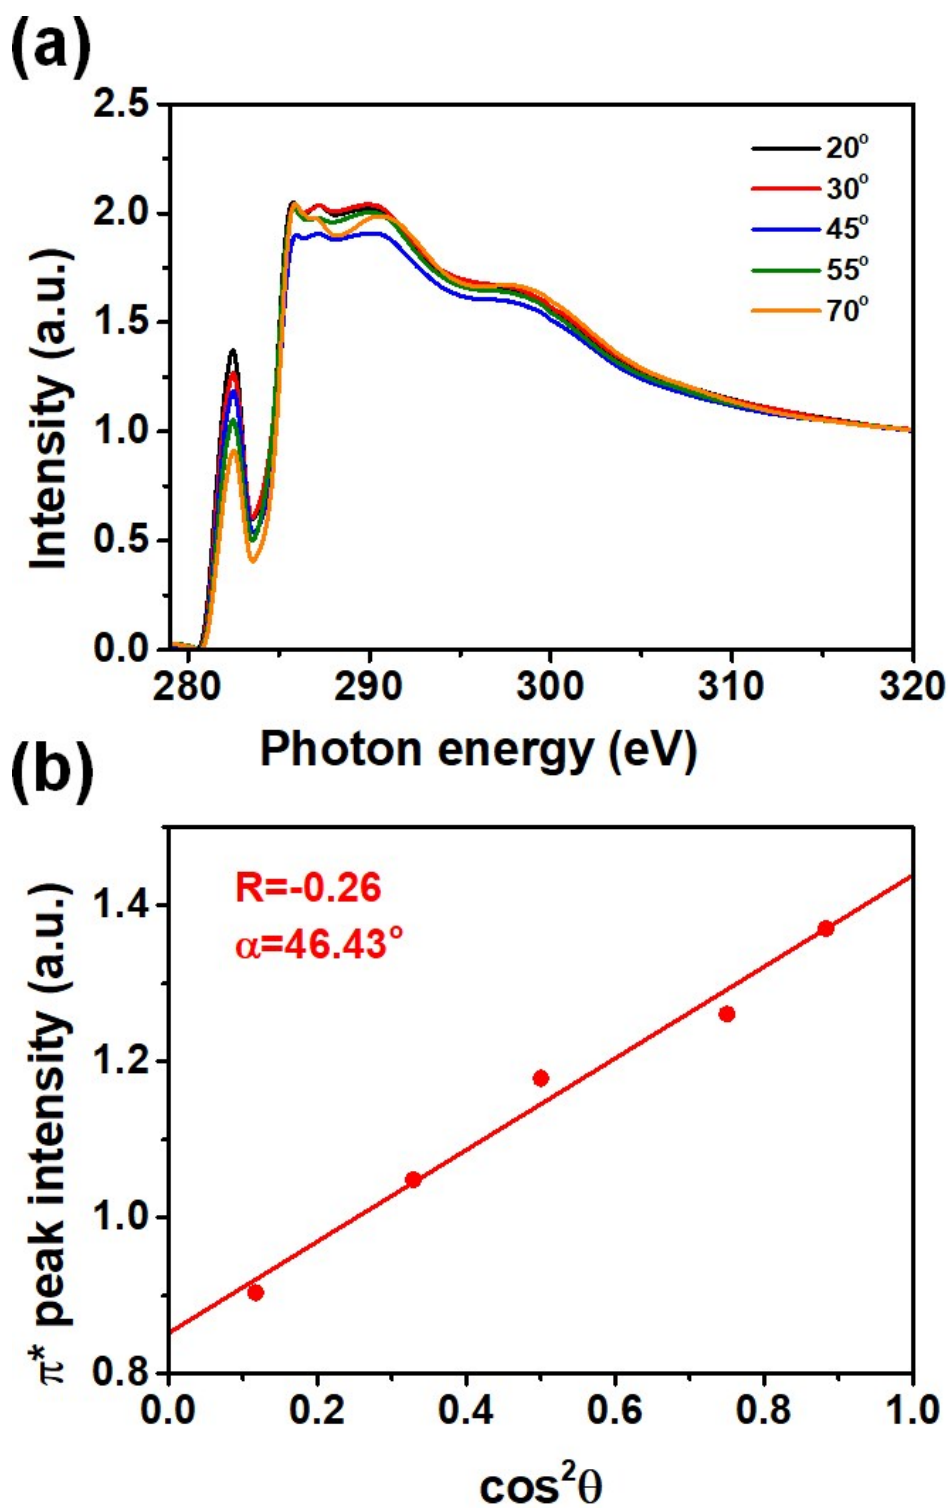

Fig. S5 (a) NEXAFS PEY mode of Zn-SnO<sub>2</sub>. (b) Intensities of  $\pi^*$  transitions vs incidence angle.

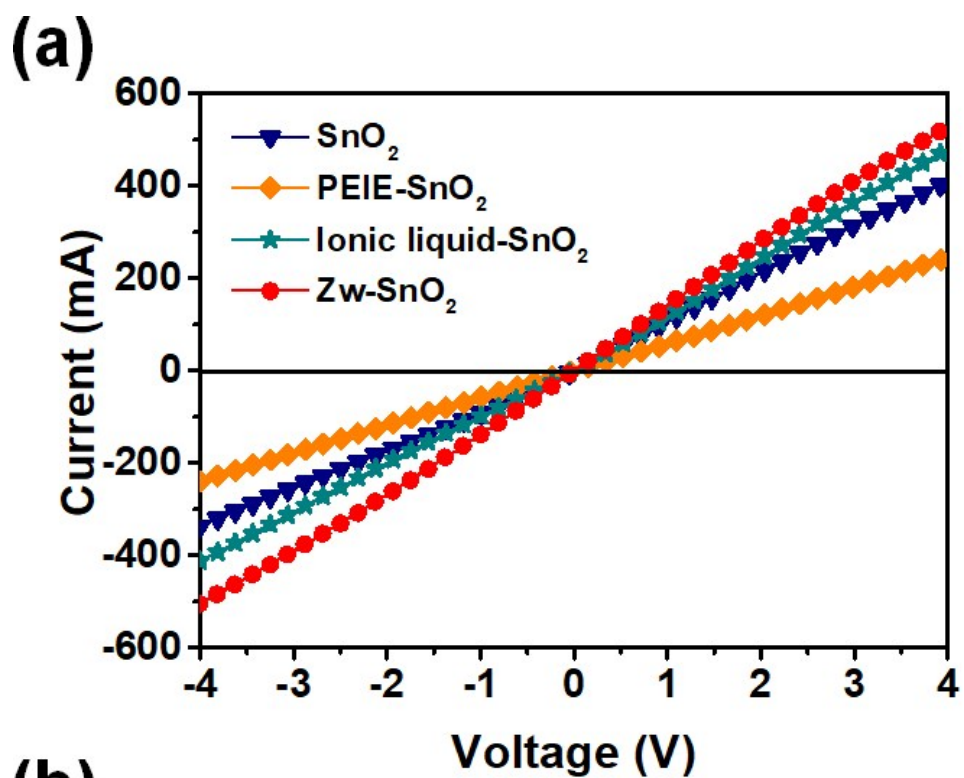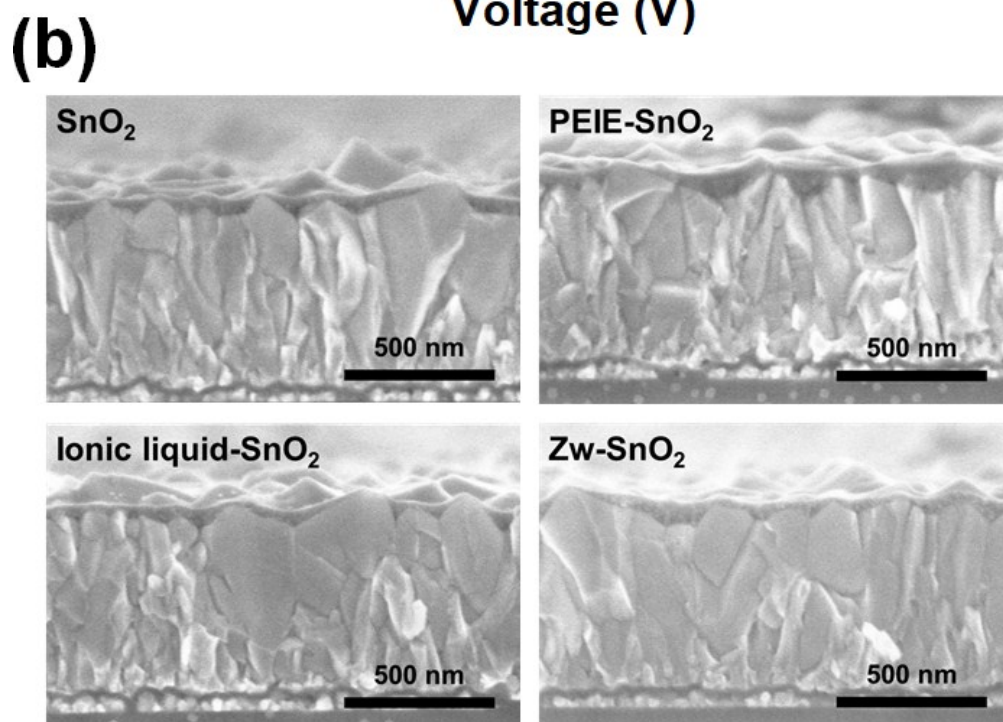

**Fig. S6** (a)  $I$ - $V$  characteristics of FTO/SnO<sub>2</sub>/Au, FTO/SnO<sub>2</sub>/PEIE/Au, FTO/SnO<sub>2</sub>/IL/Au and FTO/SnO<sub>2</sub>/zwitterion/Au devices, respectively. (b) SEM images of each ETL with different interlayers, respectively.

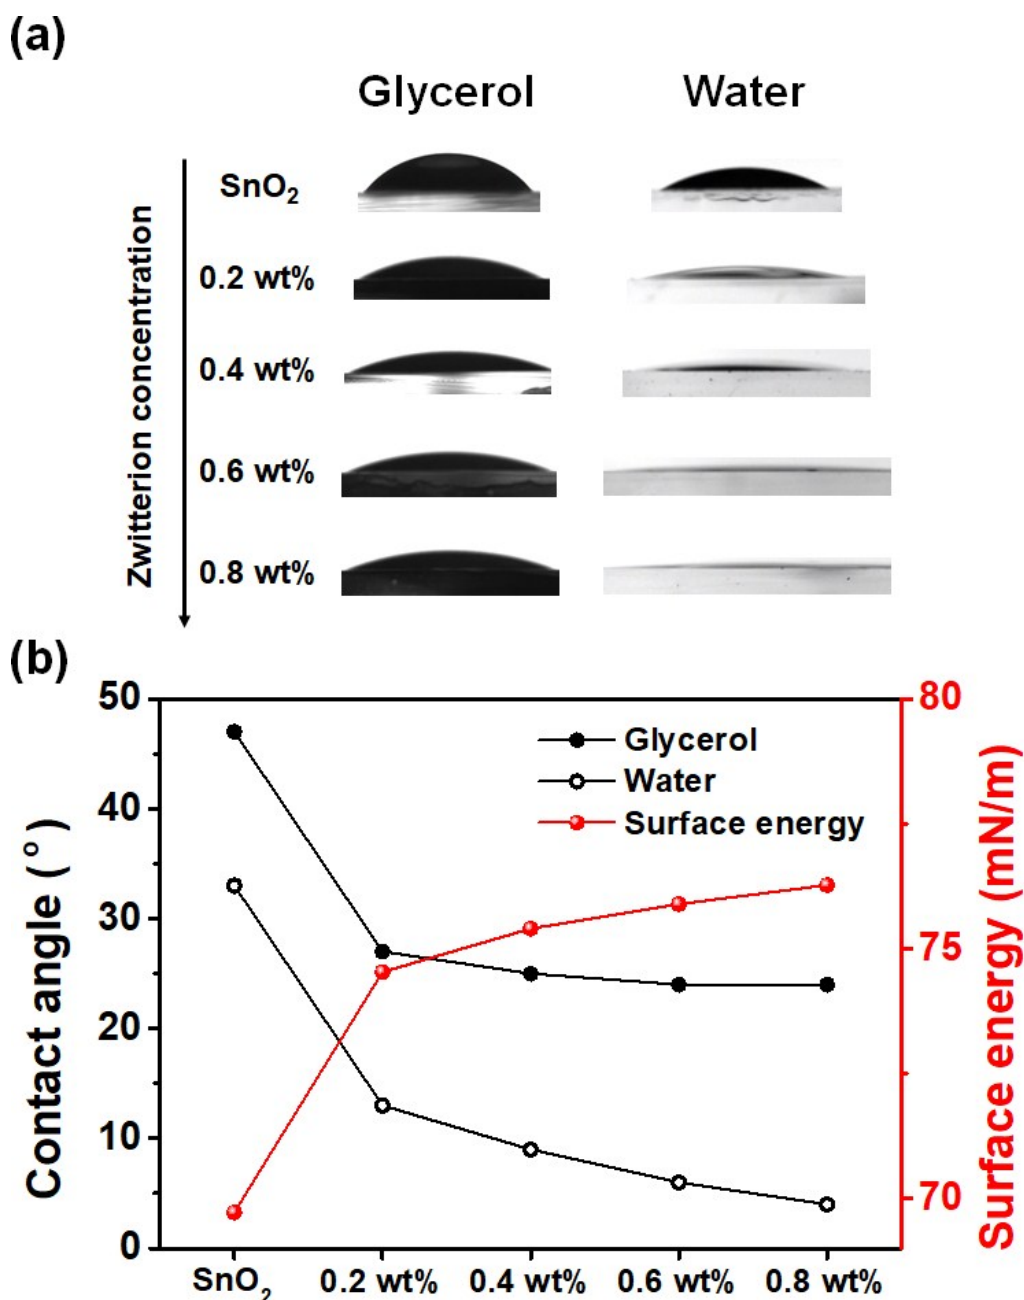

**Fig. S7** (a) Contact angle images of each ETL using glycerol and DI water, respectively. (b) Contact angle values and surface energies of each ETL.

Wettability is an important factor from the viewpoint of high-quality perovskite formation because pinholes can be formed on non-wetting surfaces.<sup>2</sup> To confirm the surface wettability of the ETL, contact-angle measurements were performed using deionised water (DI water) and glycerol. As the amount of zwitterion increased, the contact angle decreased, and it indicates an increase in the surface energy. This result implies that wettability with the perovskite solution is improved by zwitterion modification.

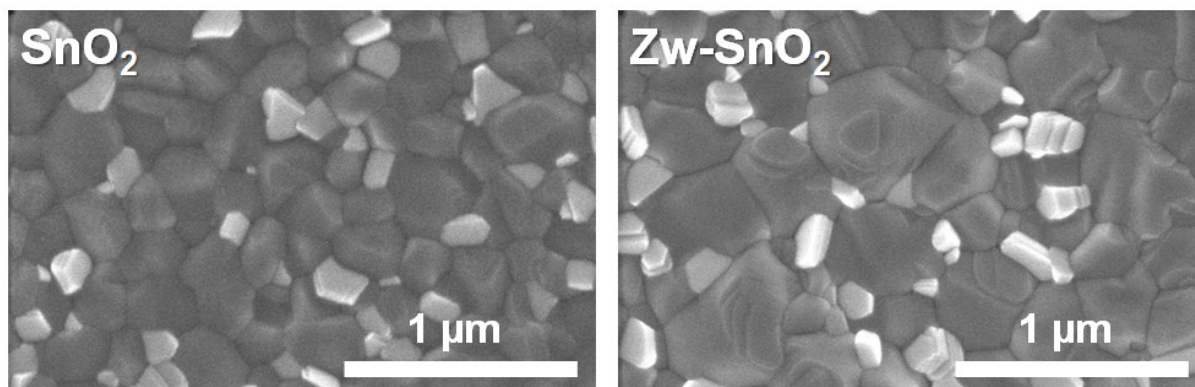

**Fig. S8** Top-view SEM images of perovskite films on the SnO<sub>2</sub> and Zw-SnO<sub>2</sub>, respectively.

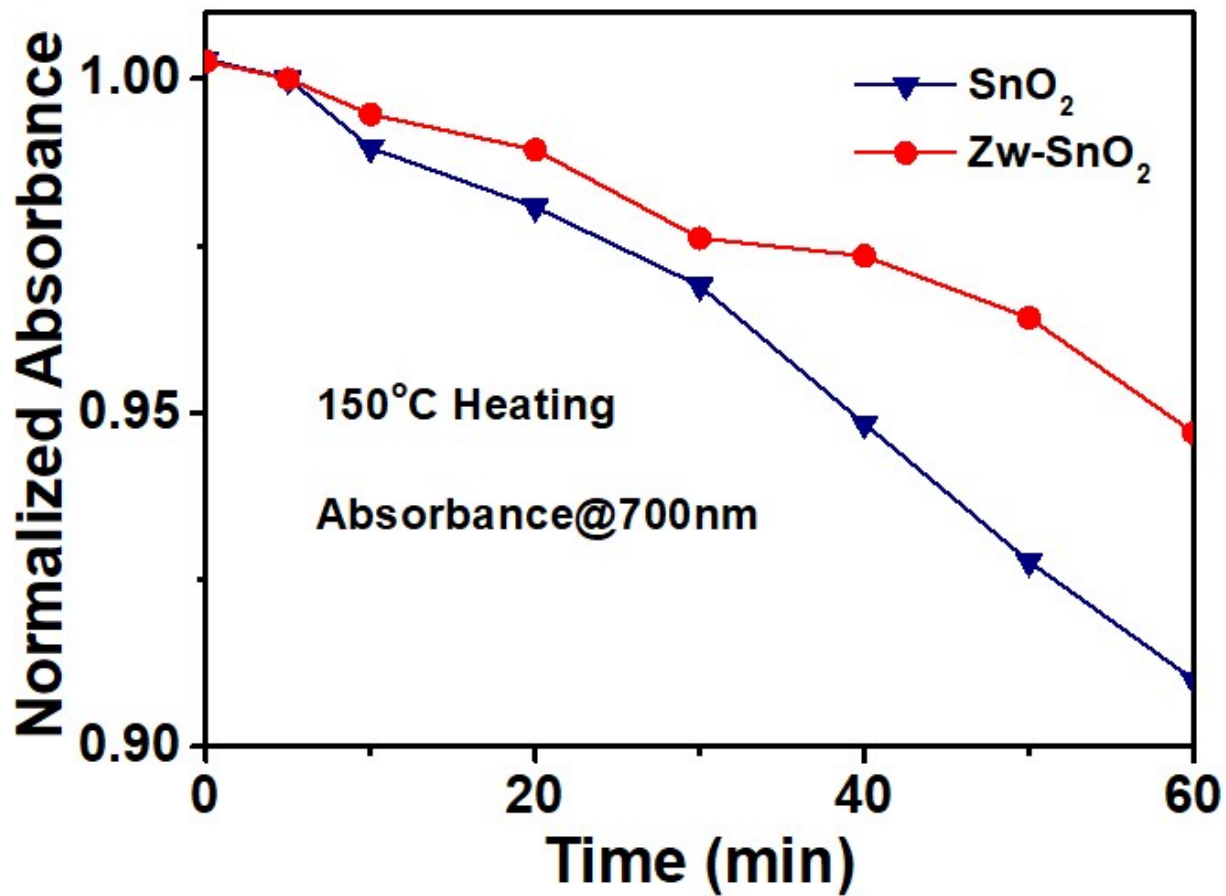

Fig. S9 Normalized absorbance at 700nm for perovskite films on the SnO<sub>2</sub> and Zw-SnO<sub>2</sub>, respectively.

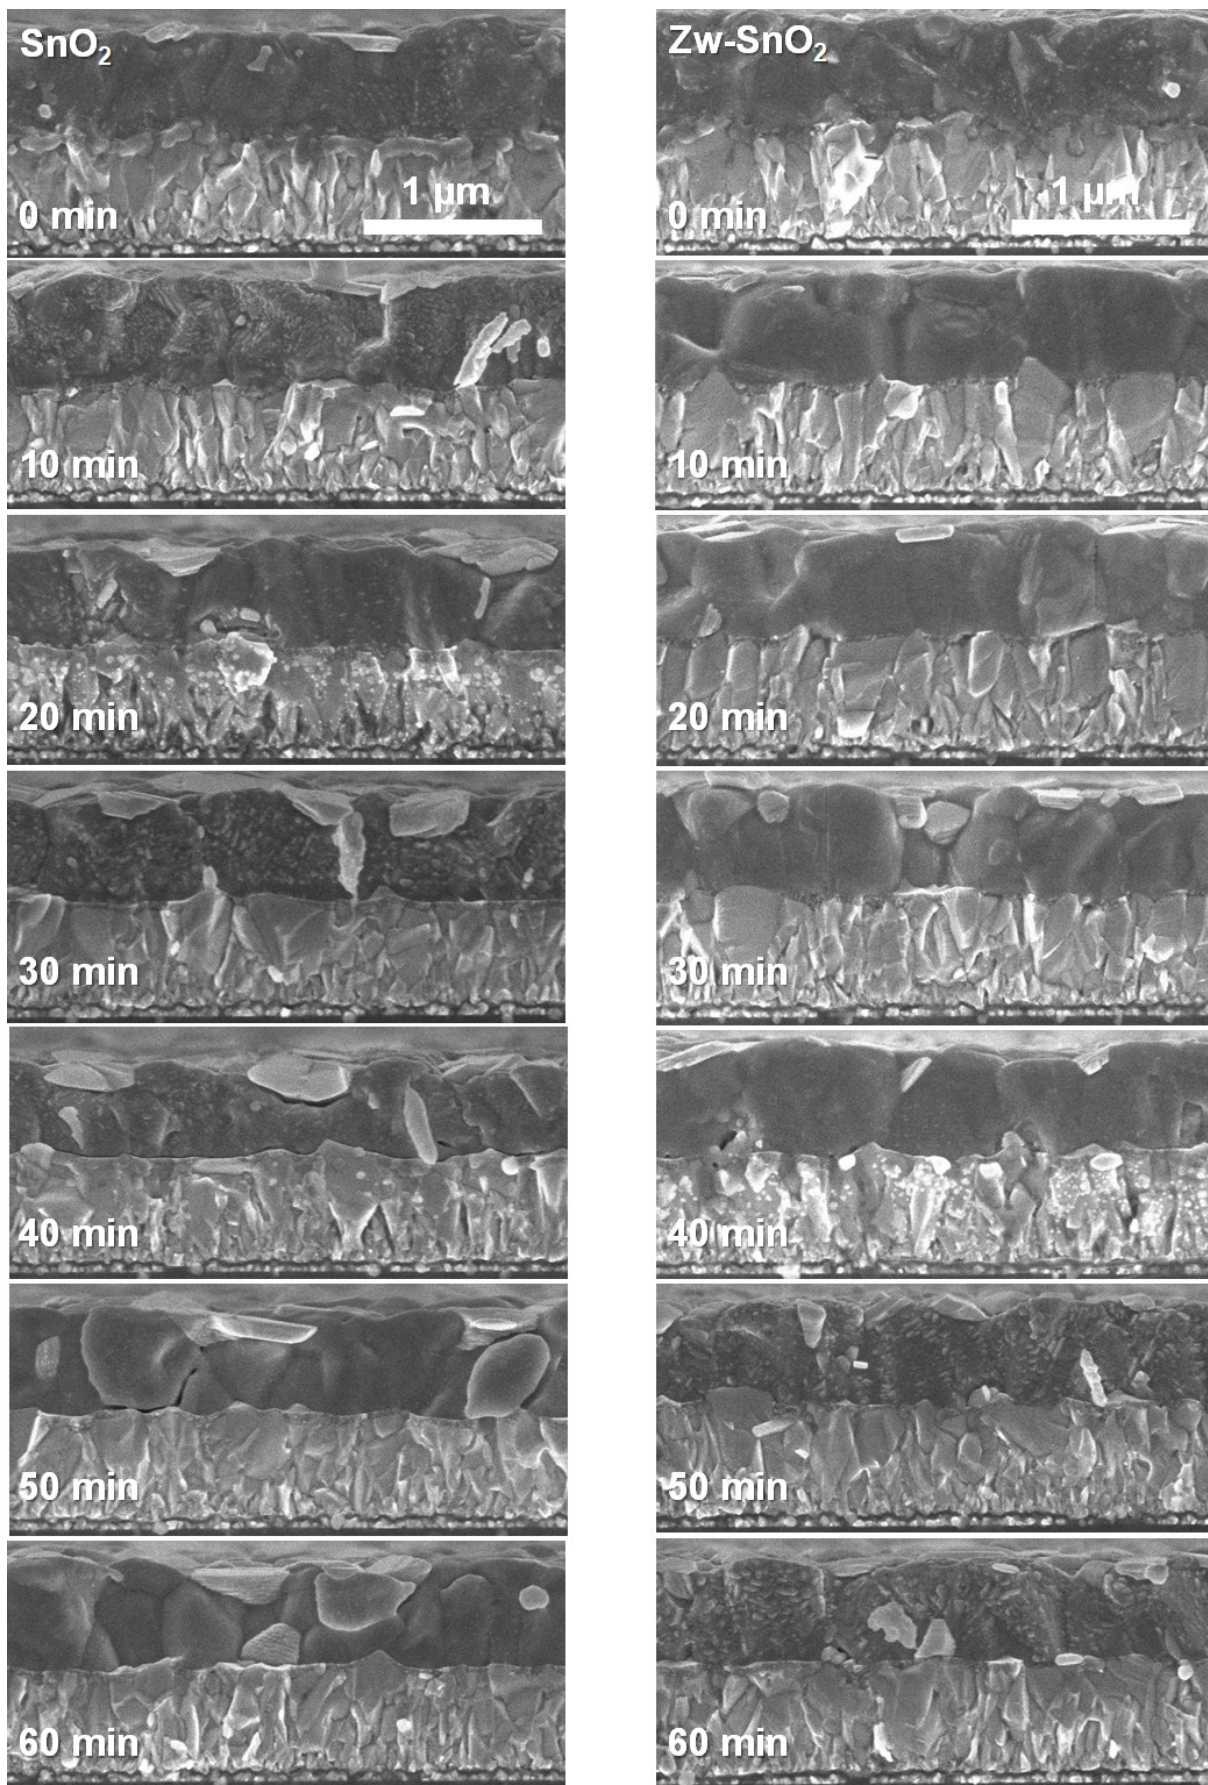

**Fig. S10** Cross-sectional SEM images of the  $\text{SnO}_2$  and  $\text{Zw-SnO}_2$ -based samples under heat treatment at 150°C.

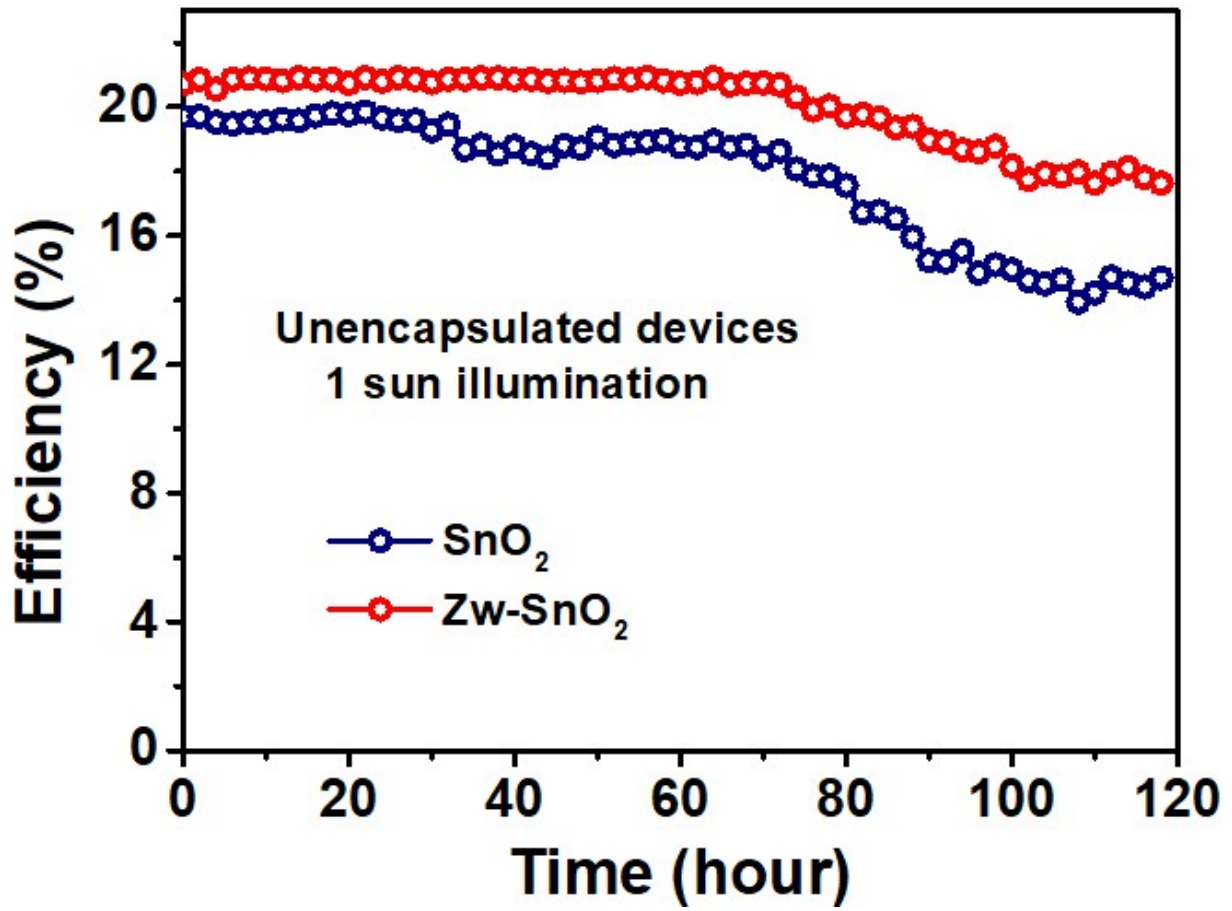

**Fig. S11** PCE of the SnO<sub>2</sub> and Zw-SnO<sub>2</sub>-based device as a function of time under 1 sun illumination.



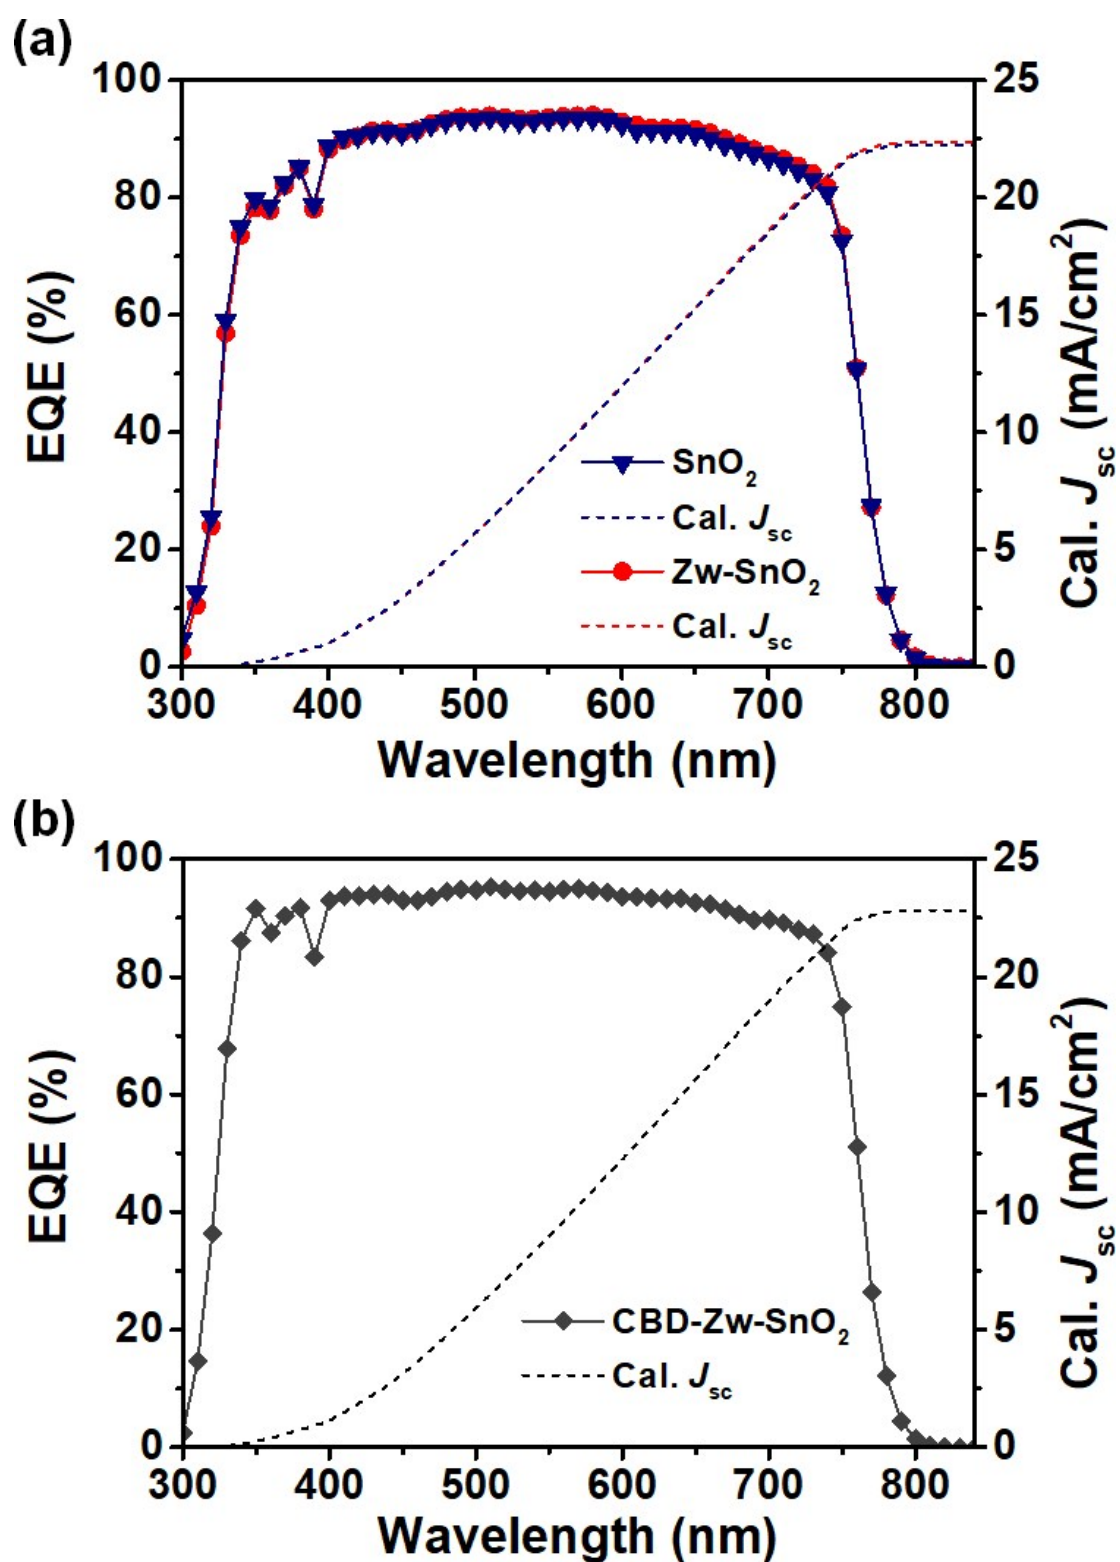

**Fig. S12** IPCE measurement and integrated  $J_{sc}$  of (a) SnO<sub>2</sub>, Zw-SnO<sub>2</sub> and (b) CBD-Zw-SnO<sub>2</sub> device, respectively.

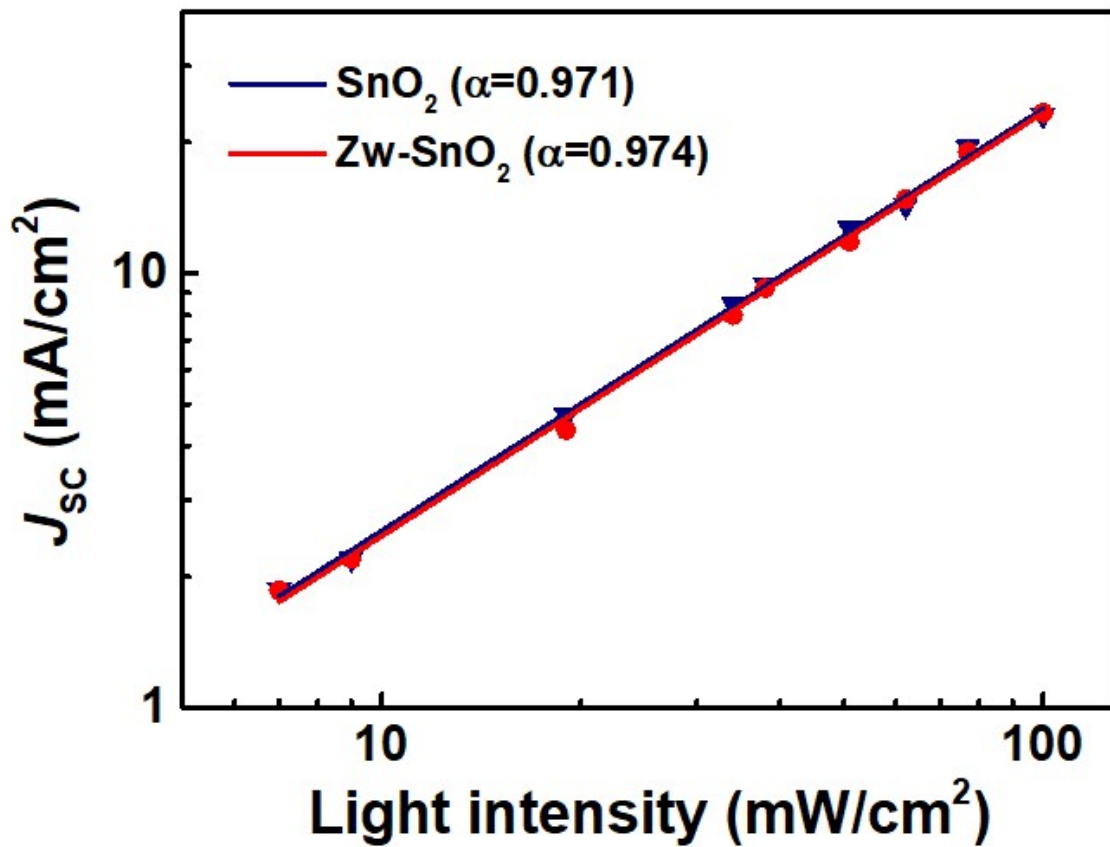

Fig. S13  $J_{sc}$  dependence on light intensity.

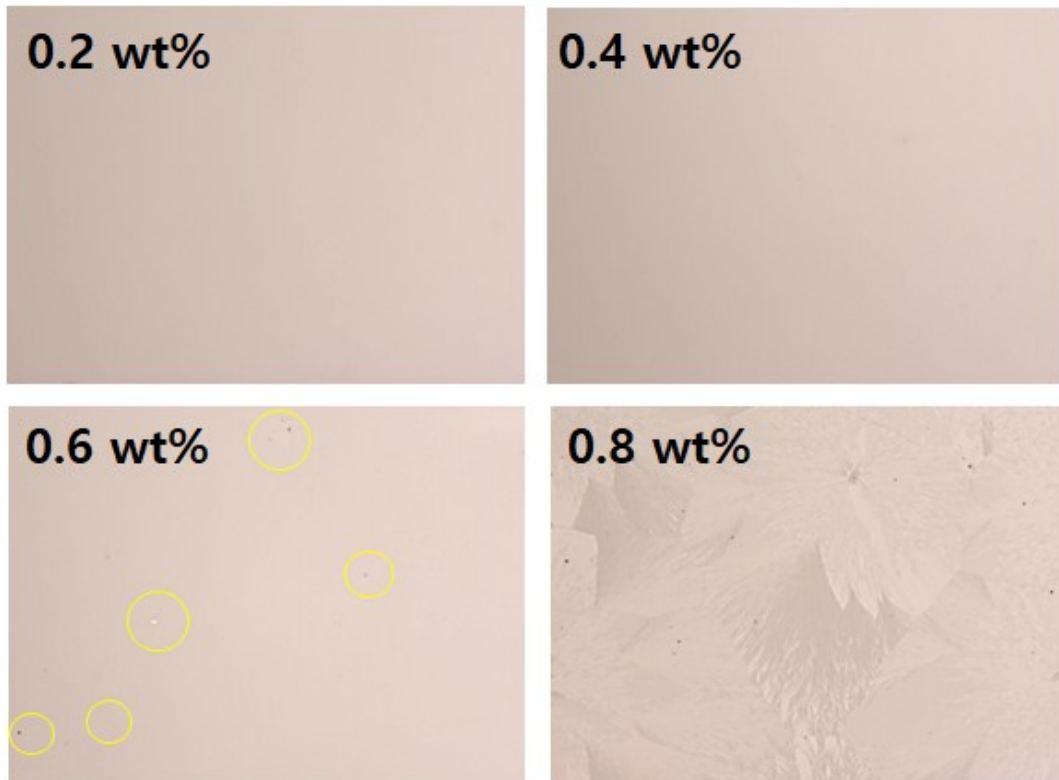

**Fig. S14** Optical microscope images of Zn-SnO<sub>2</sub> with different concentrations, respectively.

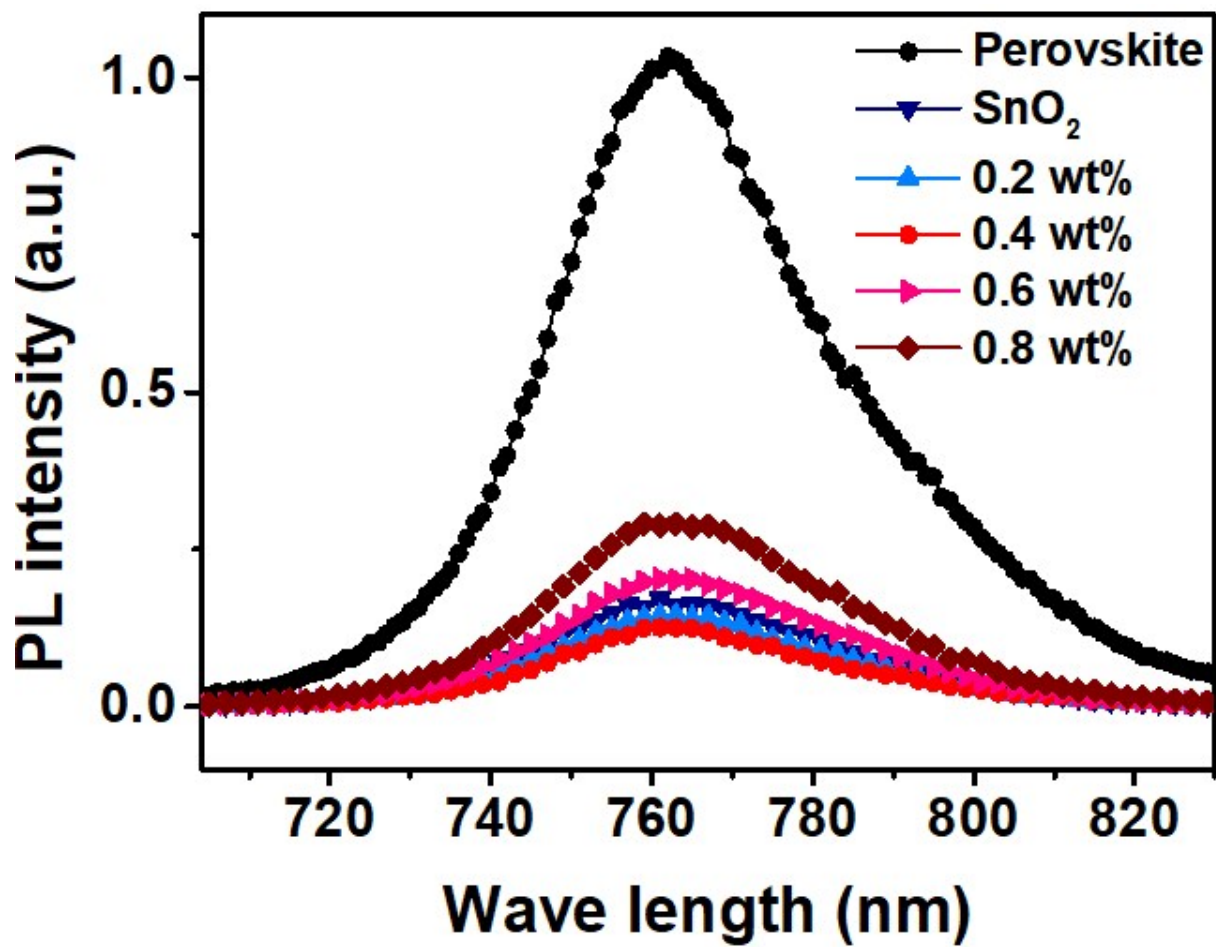

Fig. S15 Steady state photoluminescence (PL) spectra of SnO<sub>2</sub> and Zw-SnO<sub>2</sub>, respectively.

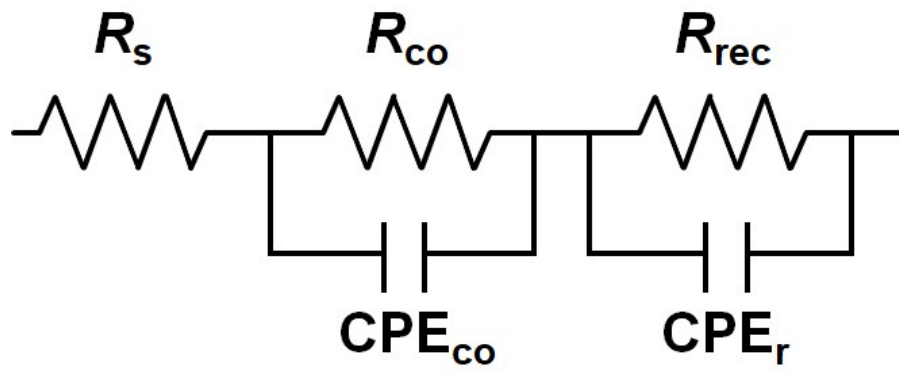

**Fig. S16** Equivalent circuit model for EIS measurement.

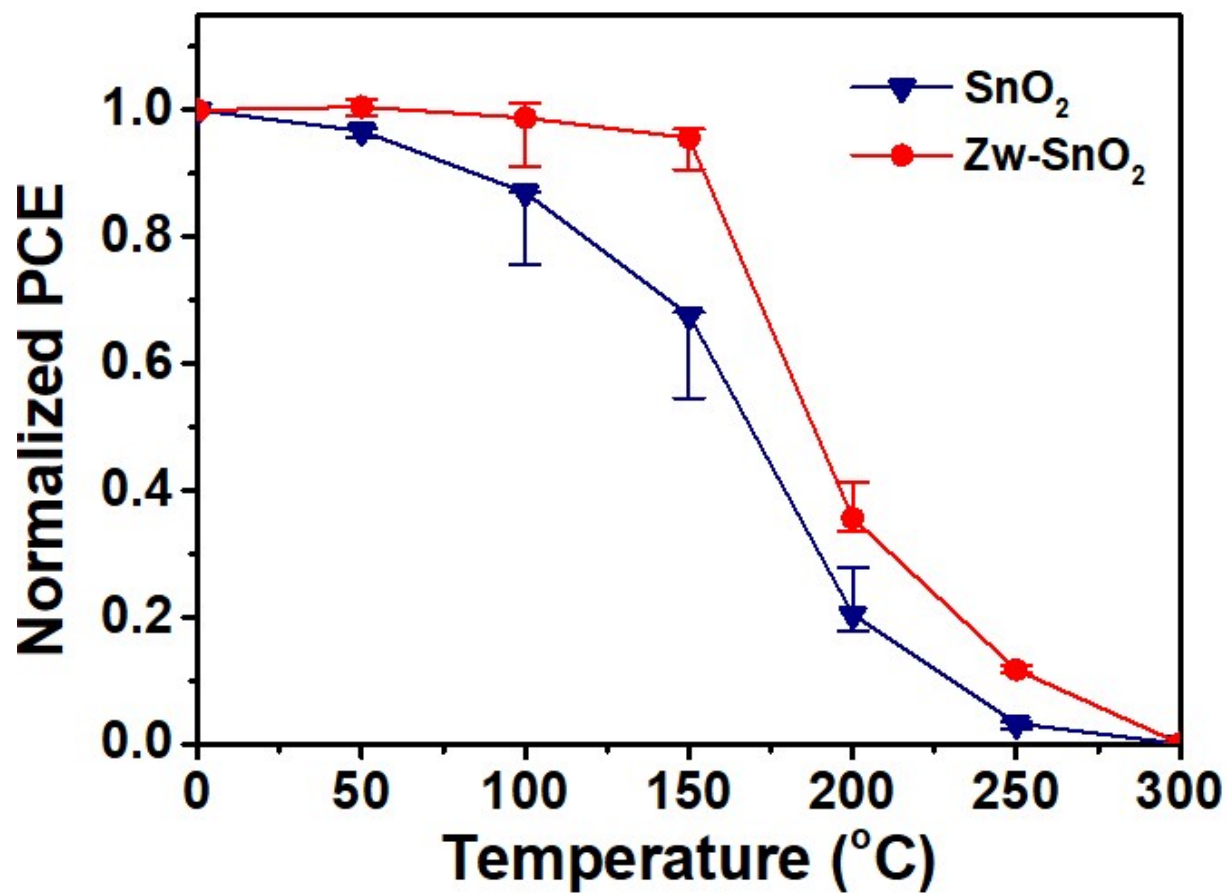

Fig. S17 Temperature-dependent thermal stability of SnO<sub>2</sub> and Zw-SnO<sub>2</sub>-based devices, respectively.

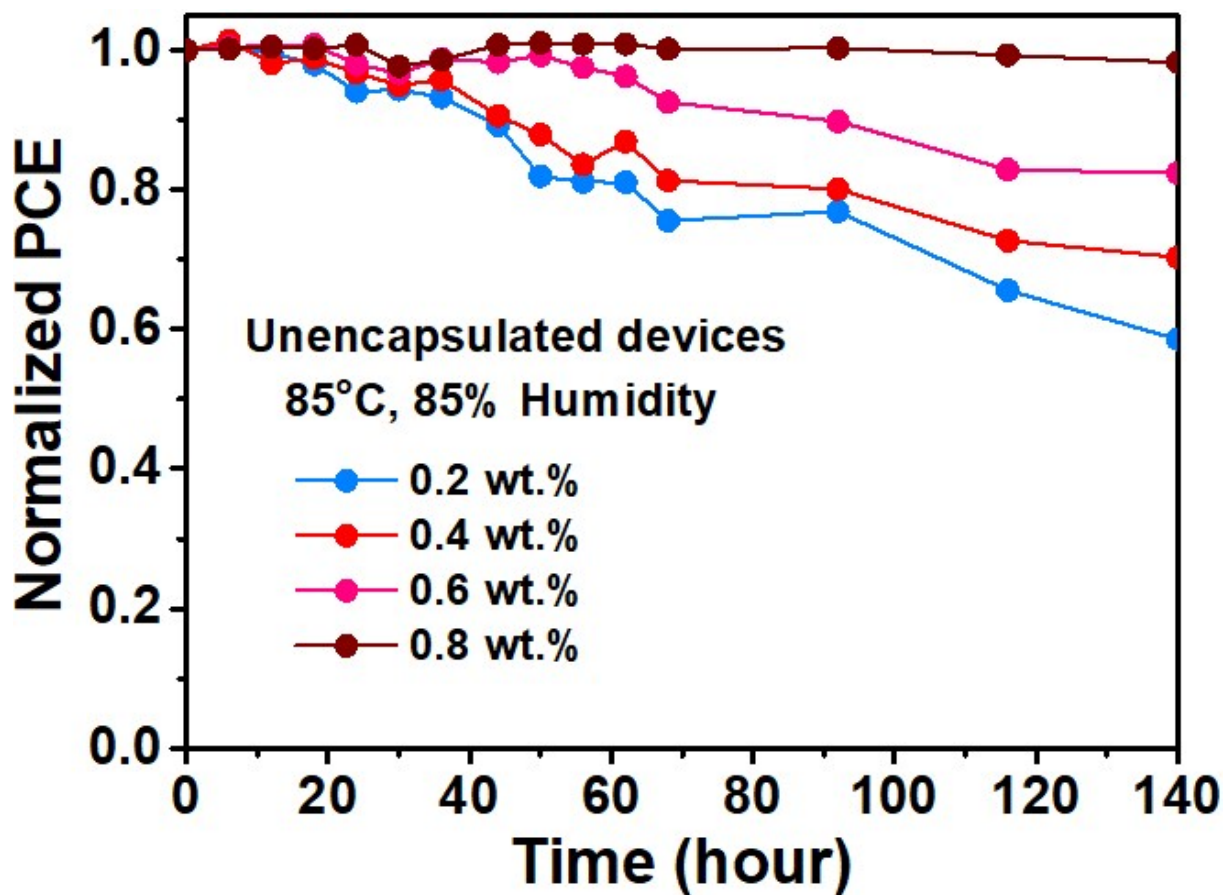

**Fig. S18** Time-dependent thermal stability of device based on different concentrations of zwitterion at 85°C, 85 % humidity.

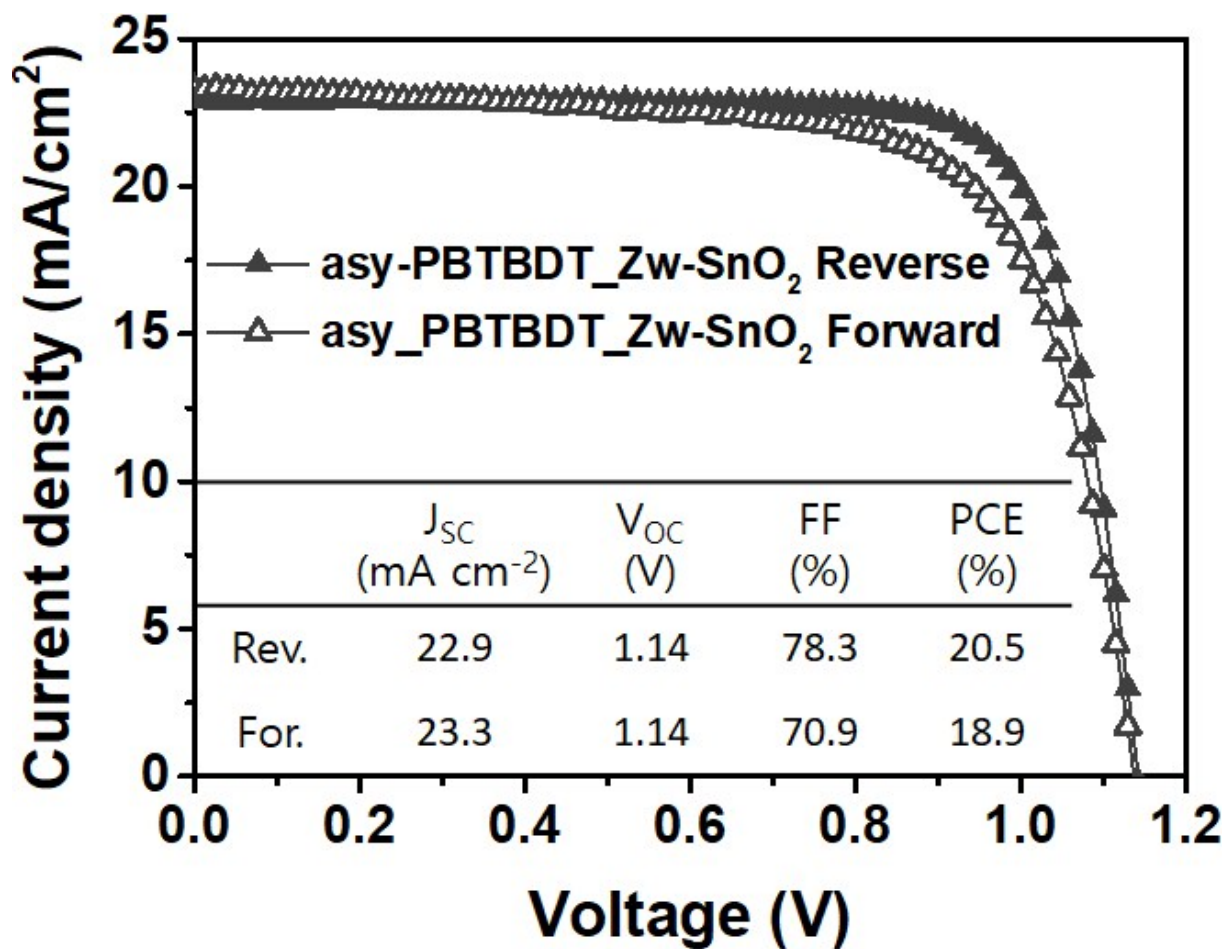

Fig. S19  $J$ - $V$  curves of asy\_PBTBDT\_Zw-SnO<sub>2</sub>-based device.



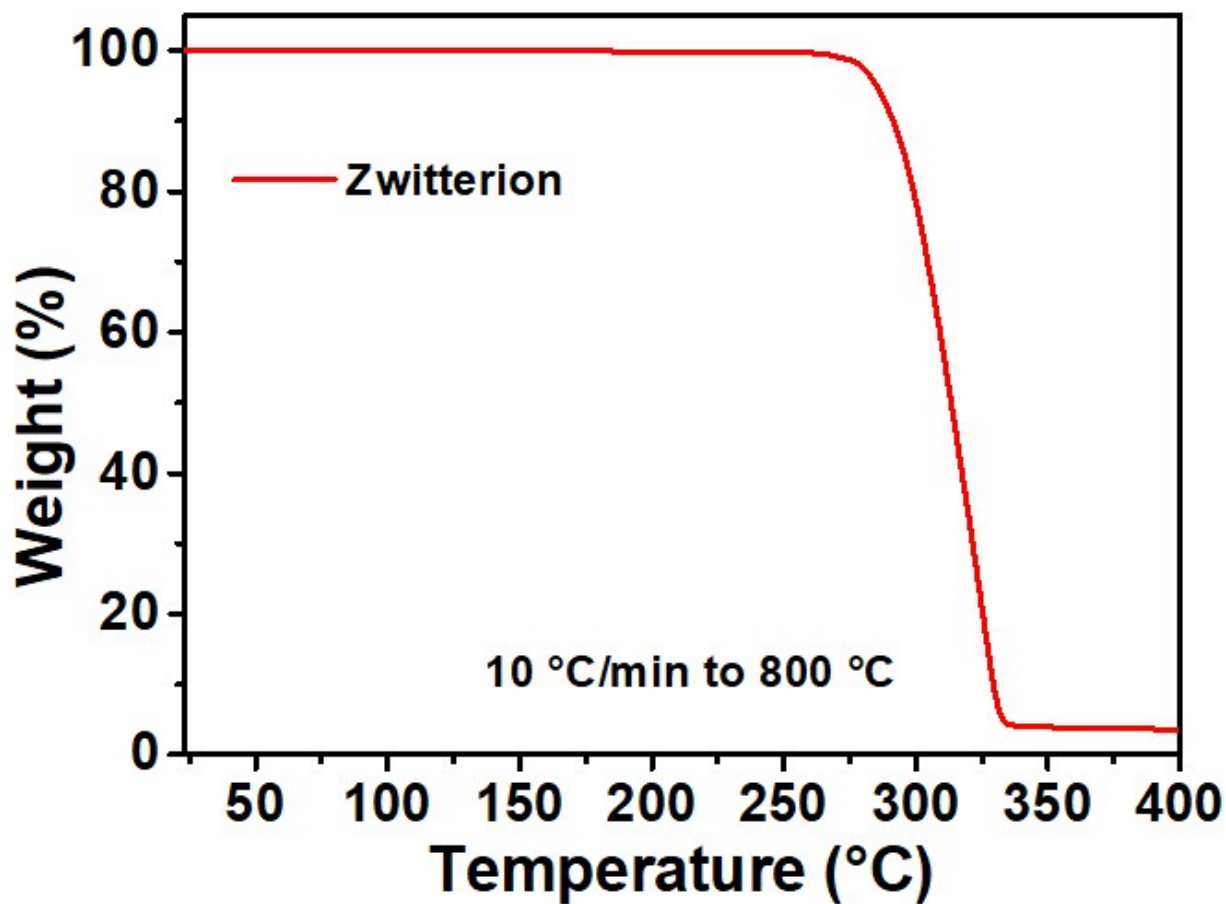

Fig. S20 TGA curve of 3-(1-pyridinio)-1-propanesulfonate.

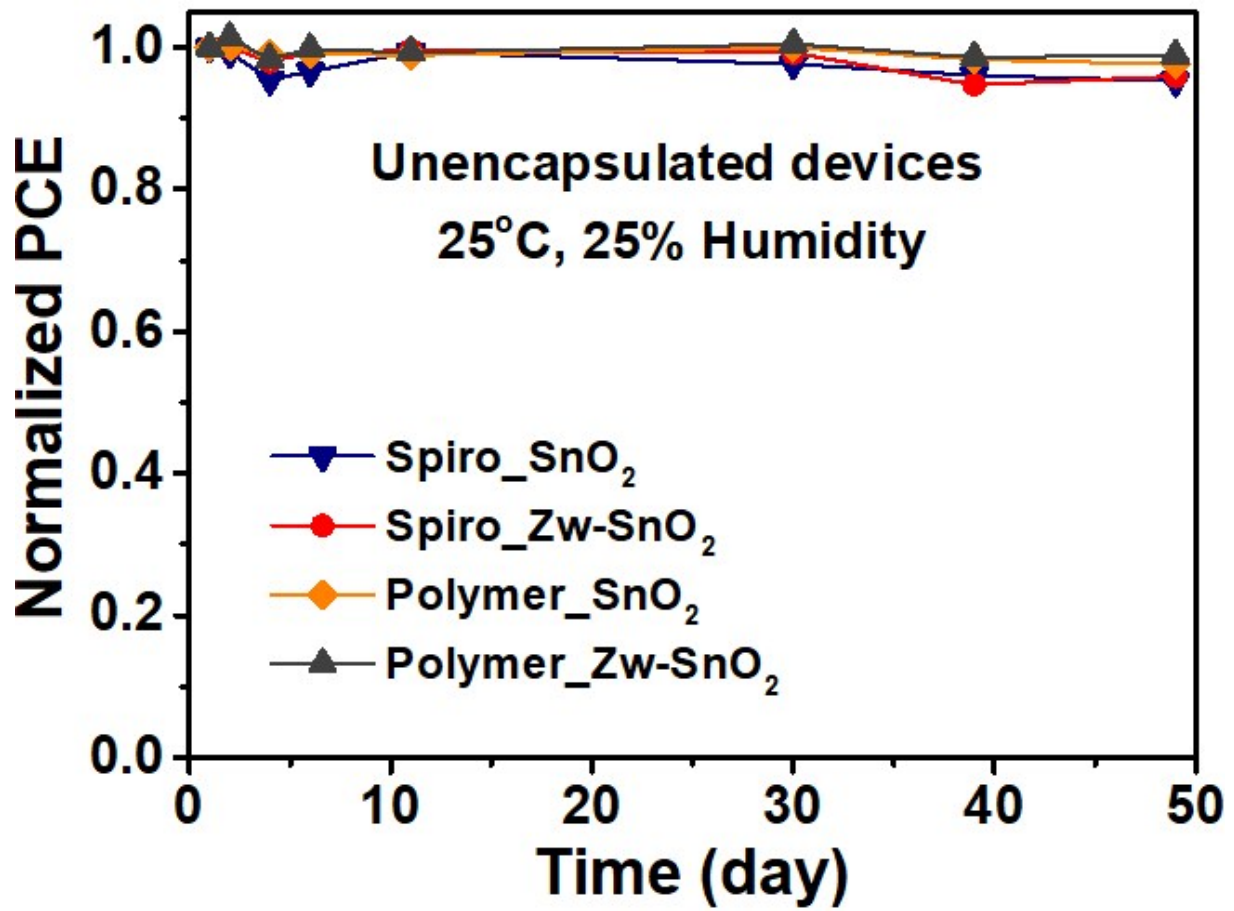

Fig. S21 Long-term stability test at 25°C, 25 % humidity.

**Table S1** Calculated parameters for the energy level of ETLs

| ETL                 | $E_{\text{cutoff}}$ (eV) | $E_{\text{onset}}$ (eV) | WF (eV) | $E_{\text{g}}$ | VB (eV) | CB (eV) |
|---------------------|--------------------------|-------------------------|---------|----------------|---------|---------|
| SnO <sub>2</sub>    | 16.88                    | 4.09                    | 4.34    | 4.15           | 8.43    | 4.28    |
| Zw-SnO <sub>2</sub> | 16.99                    | 4.14                    | 4.23    | 4.15           | 8.37    | 4.22    |

**Table S2** Calculated conductivities of each ETL with the different interlayers

| ETL                           | Slope<br>(I/V) | Thickness<br>(nm) | Conductivity<br>(mS/cm) |
|-------------------------------|----------------|-------------------|-------------------------|
| SnO <sub>2</sub>              | 93.98          | ≈ 40              | 4.18×10 <sup>-3</sup>   |
| PEIE-SnO <sub>2</sub>         | 58.28          | ≈ 50              | 3.24×10 <sup>-3</sup>   |
| Ionic liquid-SnO <sub>2</sub> | 110.49         | ≈ 40              | 4.91×10 <sup>-3</sup>   |
| Zw-SnO <sub>2</sub>           | 129.32         | ≈ 40              | 5.75×10 <sup>-3</sup>   |

**Table S3** Photovoltaic parameters obtained from the best devices at each condition

| ETL              | $J_{sc}$<br>(mA/cm <sup>2</sup> ) | $V_{oc}$<br>(V) | $FF$<br>(%) | PCE<br>(%) |
|------------------|-----------------------------------|-----------------|-------------|------------|
| SnO <sub>2</sub> | 23.0                              | 1.10            | 77.6        | 19.63      |
| 0.2 wt.%         | 23.2                              | 1.12            | 78.3        | 20.28      |
| 0.4 wt.%         | 23.2                              | 1.14            | 78.8        | 20.91      |
| 0.6 wt.%         | 23.1                              | 1.13            | 76.0        | 19.90      |
| 0.8 wt.%         | 22.6                              | 1.13            | 76.0        | 19.35      |

**Table S4** Summary of the electron lifetimes

| ETL              | $\tau_1$ (ns) | $\tau_2$ (ns) | $A_1$ (%) | $A_2$ (%) |
|------------------|---------------|---------------|-----------|-----------|
| SnO <sub>2</sub> | 8.44          | 249.15        | 41.65     | 45.49     |
| 0.2 wt.%         | 8.86          | 169.18        | 51.01     | 37.49     |
| 0.4 wt.%         | 5.86          | 131.71        | 54.13     | 40.03     |
| 0.6 wt.%         | 9.01          | 317.64        | 46.09     | 48.09     |
| 0.8 wt.%         | 11.35         | 445.74        | 43.82     | 45.18     |

**Table S5** Slope of the Mott–Schottky plots and doping densities of ETLs

| ETL              | Slope<br>( $10^{16} \times F^{-2} V^{-1}$ ) | $N$<br>( $10^{15} \times cm^{-3}$ ) |
|------------------|---------------------------------------------|-------------------------------------|
| SnO <sub>2</sub> | 10.08                                       | 4.38                                |
| 0.2 wt.%         | 7.38                                        | 5.99                                |
| 0.4 wt.%         | 6.76                                        | 6.53                                |
| 0.6 wt.%         | 5.31                                        | 8.31                                |
| 0.8 wt.%         | 4.67                                        | 9.45                                |

**Table S6** Parameters of the equivalent circuit

|                     | $R_s$ ( $\Omega$ ) | $R_{rec}$ ( $\Omega$ ) |
|---------------------|--------------------|------------------------|
| ETL                 |                    |                        |
| SnO <sub>2</sub>    | 8.00               | 133                    |
| Zw-SnO <sub>2</sub> | 8.10               | 255                    |



**Table S7** The initial absolute PCEs for SnO<sub>2</sub> and Zw-SnO<sub>2</sub> devices

| SnO <sub>2</sub>                                 |                               |                  |            | Zw-SnO <sub>2</sub>                              |                               |                  |            |
|--------------------------------------------------|-------------------------------|------------------|------------|--------------------------------------------------|-------------------------------|------------------|------------|
| <i>J</i> <sub>sc</sub><br>(mA cm <sup>-2</sup> ) | <i>V</i> <sub>oc</sub><br>(V) | <i>FF</i><br>(%) | PCE<br>(%) | <i>J</i> <sub>sc</sub><br>(mA cm <sup>-2</sup> ) | <i>V</i> <sub>oc</sub><br>(V) | <i>FF</i><br>(%) | PCE<br>(%) |
| 23                                               | 1.12                          | 76.4             | 19.59      | 22.8                                             | 1.17                          | 77.7             | 20.74      |
| 22.9                                             | 1.09                          | 76               | 18.91      | 23.1                                             | 1.17                          | 75.6             | 20.5       |
| 22.4                                             | 1.1                           | 77.6             | 19.17      | 23.4                                             | 1.19                          | 74.9             | 20.79      |
| 21.9                                             | 1.12                          | 78.6             | 19.18      | 22.3                                             | 1.17                          | 77.8             | 20.33      |
| 23                                               | 1.09                          | 75.6             | 18.91      | 22.5                                             | 1.16                          | 79.9             | 20.81      |
| 22.7                                             | 1.1                           | 73.6             | 18.4       | 22.8                                             | 1.17                          | 78.1             | 20.92      |
| 22.1                                             | 1.1                           | 76.8             | 18.72      | 22.5                                             | 1.17                          | 78.9             | 20.86      |
| 21.9                                             | 1.1                           | 77.4             | 18.71      | 23.1                                             | 1.16                          | 78.4             | 20.93      |
| 22.4                                             | 1.12                          | 76.6             | 19.11      | 23                                               | 1.14                          | 77.2             | 20.28      |
| 22.7                                             | 1.07                          | 74.3             | 18.12      | 23.4                                             | 1.16                          | 77.1             | 20.97      |
| 23                                               | 1.09                          | 75.8             | 18.94      | 23.6                                             | 1.16                          | 76.9             | 21.12      |
| 22.5                                             | 1.09                          | 77.3             | 18.89      | 23.5                                             | 1.16                          | 75.2             | 20.45      |
| 23                                               | 1.07                          | 75.9             | 18.71      | 23                                               | 1.16                          | 77.4             | 20.73      |
| 23.1                                             | 1.12                          | 74.9             | 19.25      | 22.7                                             | 1.16                          | 77.4             | 20.47      |
| 22.8                                             | 1.07                          | 78.3             | 19.02      | 22.8                                             | 1.16                          | 79.5             | 20.98      |
| 23                                               | 1.07                          | 76.3             | 18.71      | 23.2                                             | 1.17                          | 76.7             | 20.88      |
| 23.1                                             | 1.05                          | 75.6             | 18.39      | 22.6                                             | 1.17                          | 79.5             | 21.06      |
| 22.5                                             | 1.09                          | 76.2             | 18.67      | 23.4                                             | 1.14                          | 75.8             | 20.25      |

**Table S8** Summary of device performances obtained from devices employing Spiro\_SnO<sub>2</sub>, Spiro\_Zw-SnO<sub>2</sub>, Polymer\_SnO<sub>2</sub> and Polymer\_Zw-SnO<sub>2</sub>. All measurements were performed under 1 sun illumination (AM 1.5G, 100 mW cm<sup>-2</sup>) and an active area of 0.09 cm<sup>2</sup>

| Structure                   | $J_{sc}$<br>(mA cm <sup>-2</sup> ) | $V_{oc}$<br>(V) | $FF$<br>(%) | PCE<br>(%) |
|-----------------------------|------------------------------------|-----------------|-------------|------------|
| Spiro_SnO <sub>2</sub>      | 22.9                               | 1.12            | 77.5        | 19.8       |
| After 140 h                 | 19.9                               | 0.948           | 45.8        | 8.6        |
| Spiro_Zw-SnO <sub>2</sub>   | 22.9                               | 1.16            | 79.7        | 21.1       |
| After 140 h                 | 21.7                               | 1.07            | 63.6        | 14.8       |
| Polymer_SnO <sub>2</sub>    | 22.2                               | 1.1             | 77.1        | 18.8       |
| After 140 h                 | 21.1                               | 0.974           | 75.2        | 15.4       |
| Polymer_Zw-SnO <sub>2</sub> | 22.9                               | 1.14            | 78.3        | 20.5       |
| After 140 h                 | 21.9                               | 1.13            | 76.7        | 19.0       |

### **Reference**

1. P. Giannozzi, O. Andreussi, T. Brumme, O. Bunau, M. B. Nardelli, M. Calandra, R. Car, C. Cavazzoni, D. Ceresoli, M. Cococcioni, N. Colonna, I. Carnimeo, A. D. Corso, S. de Gironcoli, P. Delugas, R. A. DiStasio Jr, A. Ferretti, A. Floris, G. Fratesi, G. Fugallo, R. Gebauer, U. Gerstmann, F. Giustino, T. Gorni, J. Jia, M. Kawamura, H.-Y. Ko, A. Kokalj, E. Küçükbenli, M. Lazzeri, M. Marsili, N. Marzari, F. Mauri, N. L. Nguyen, H.-V. Nguyen, A. O.-de-la-Roza, L. Paulatto, S. Poncé, D. Rocca, R. Sabatini, B. Santra, M. Schlipf, A. P. Seitsonen, A. Smogunov, I. Timrov, T. Thonhauser, P. Umari, N. Vast, X. Wu and S. Baroni, *J. Phys.: Condens. Matter*, 2017, **29**, 465901.
2. S. Song, M. T. Hörantner, K. Choi, H. J. Snaith and T. Park, *J. Mater. Chem. A*, 2017, **5**, 3812-3818.
